# Supplementary material for: Levels of Evidence for Radiation Therapy Recommendations in the National Comprehensive Cancer Network (NCCN) Clinical Guidelines
Source: PubMed Central journal article supplement (PMC8626664; doi:10.1016/j.adro.2021.100832), 2021-10-29
Supplement: mmc1.pdf [file mmc1.pdf]

*Supplementary Figures*

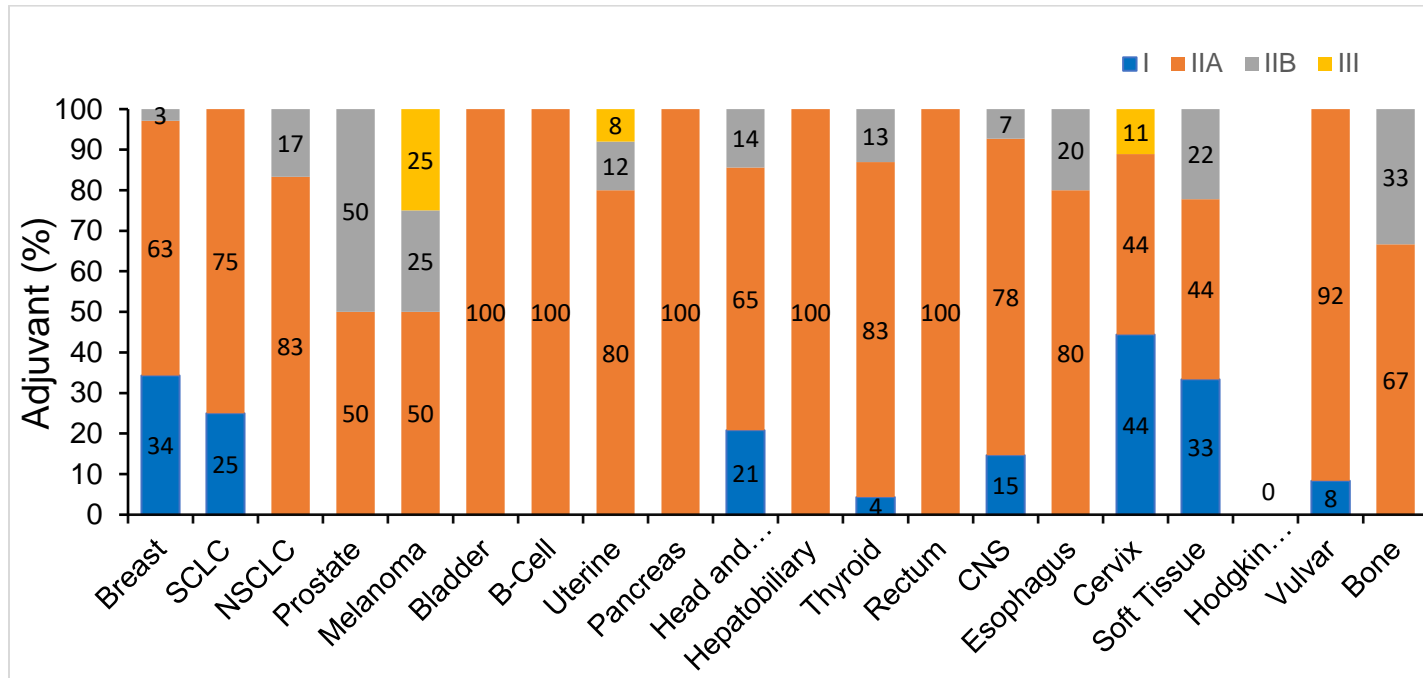

**Supplementary Figure 1A.** Distribution of NCCN categories of consensus and evidence for adjuvant radiation therapy according to disease site.

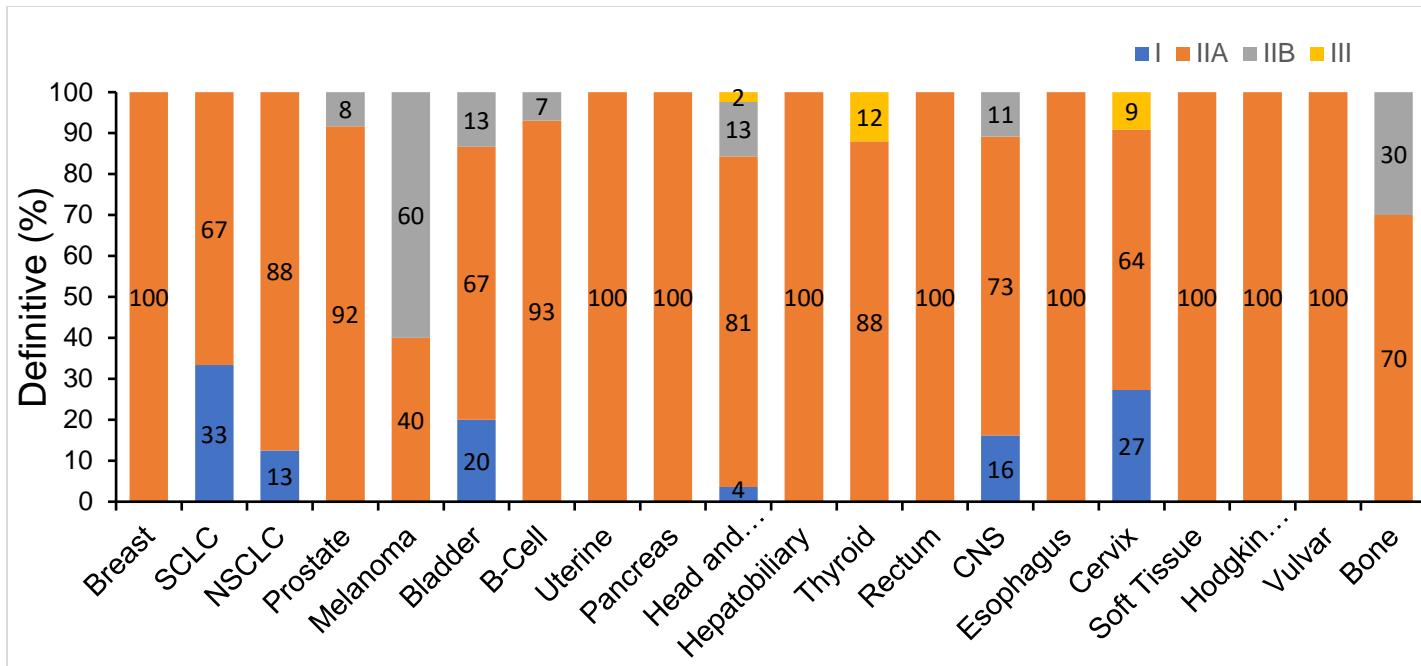

**Supplementary Figure 1B.** Distribution of NCCN categories of consensus and evidence for definitive radiation therapy according to disease site.

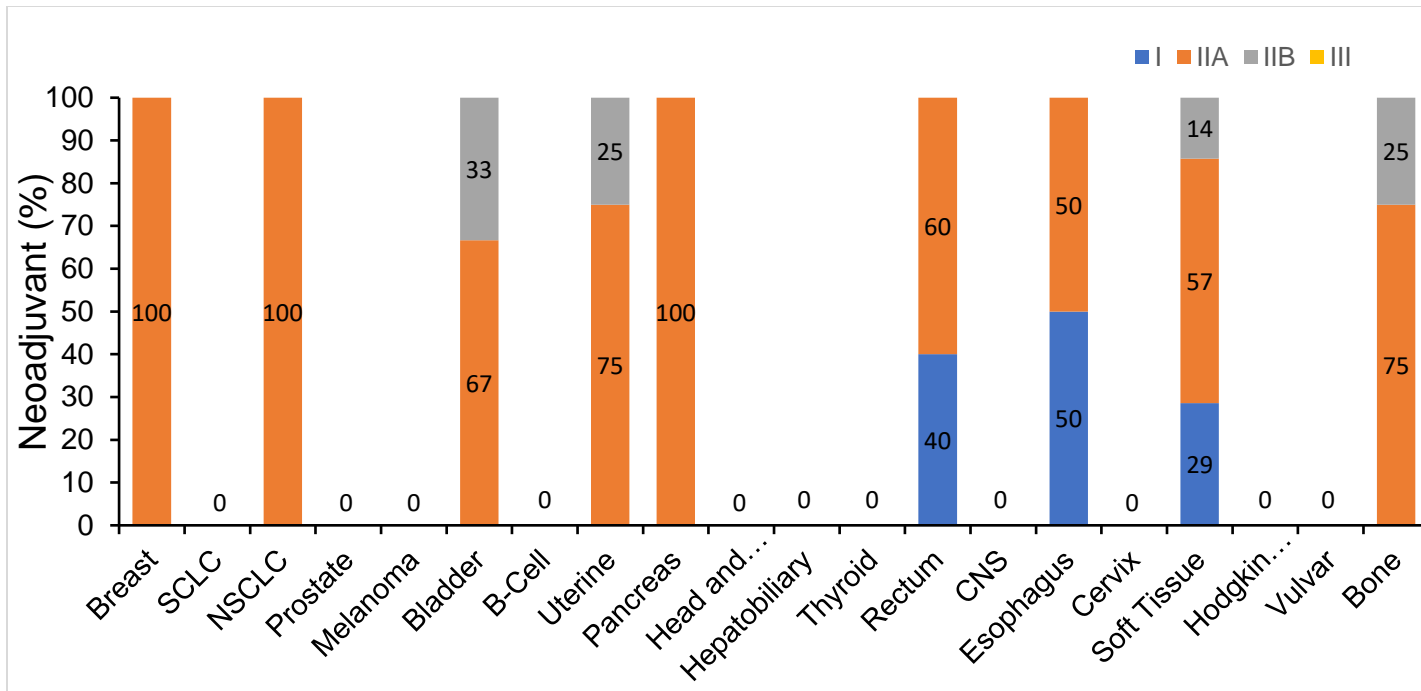

**Supplementary Figure 1C.** Distribution of NCCN categories of consensus and evidence for neoadjuvant radiation therapy according to disease site.

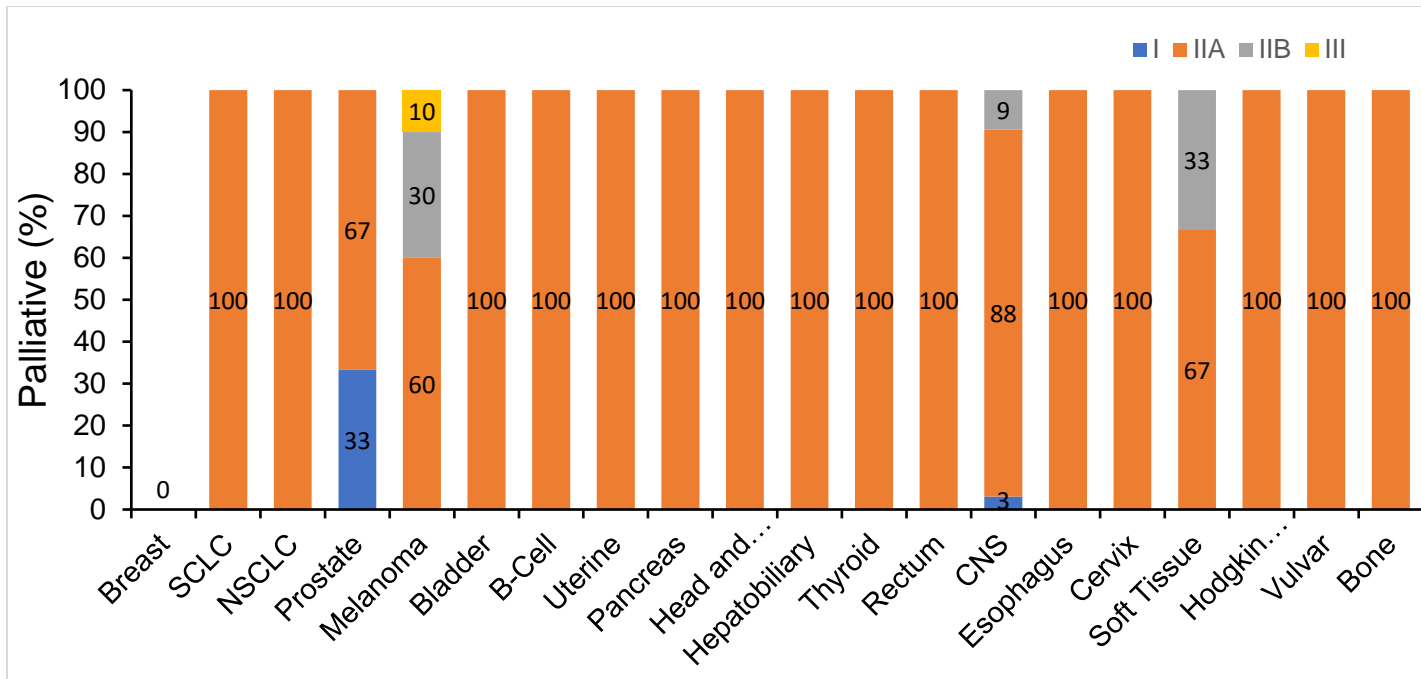

**Supplementary Figure 1D.** Distribution of NCCN categories of consensus and evidence for palliative radiation therapy according to disease site.

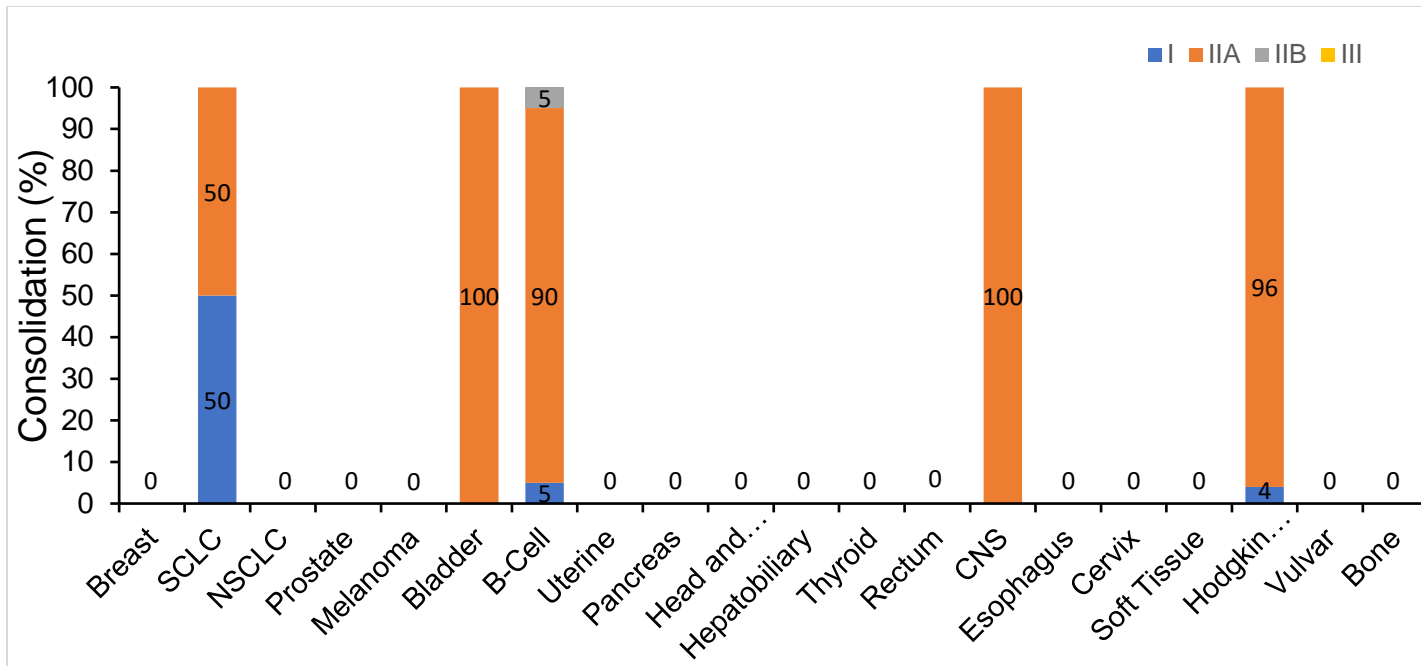

**Supplementary Figure 1E.** Distribution of NCCN categories of consensus and evidence for consolidative radiation therapy according to disease site.

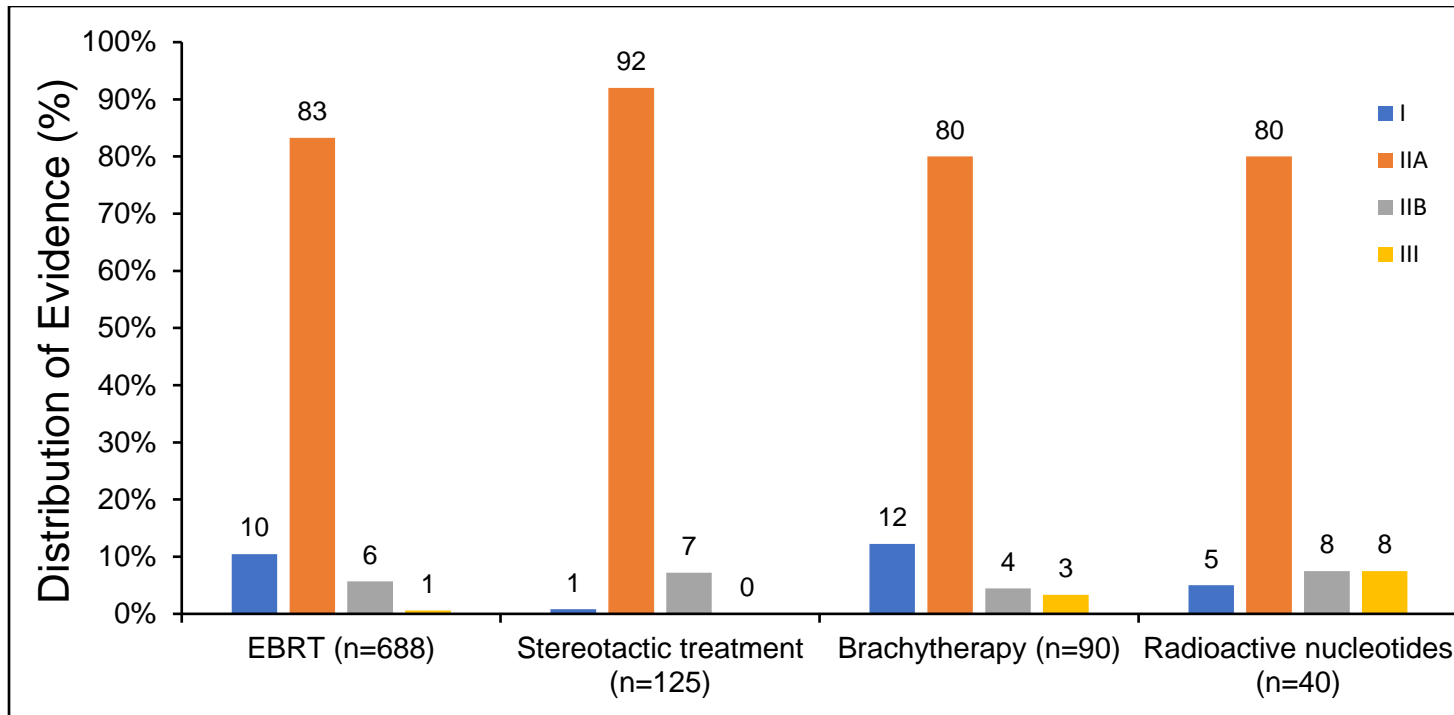

**Supplementary Figure 2.** Distribution of NCCN categories of consensus and evidence for radiation therapy by treatment modality; number of recommendations per group is shown (n=\*).

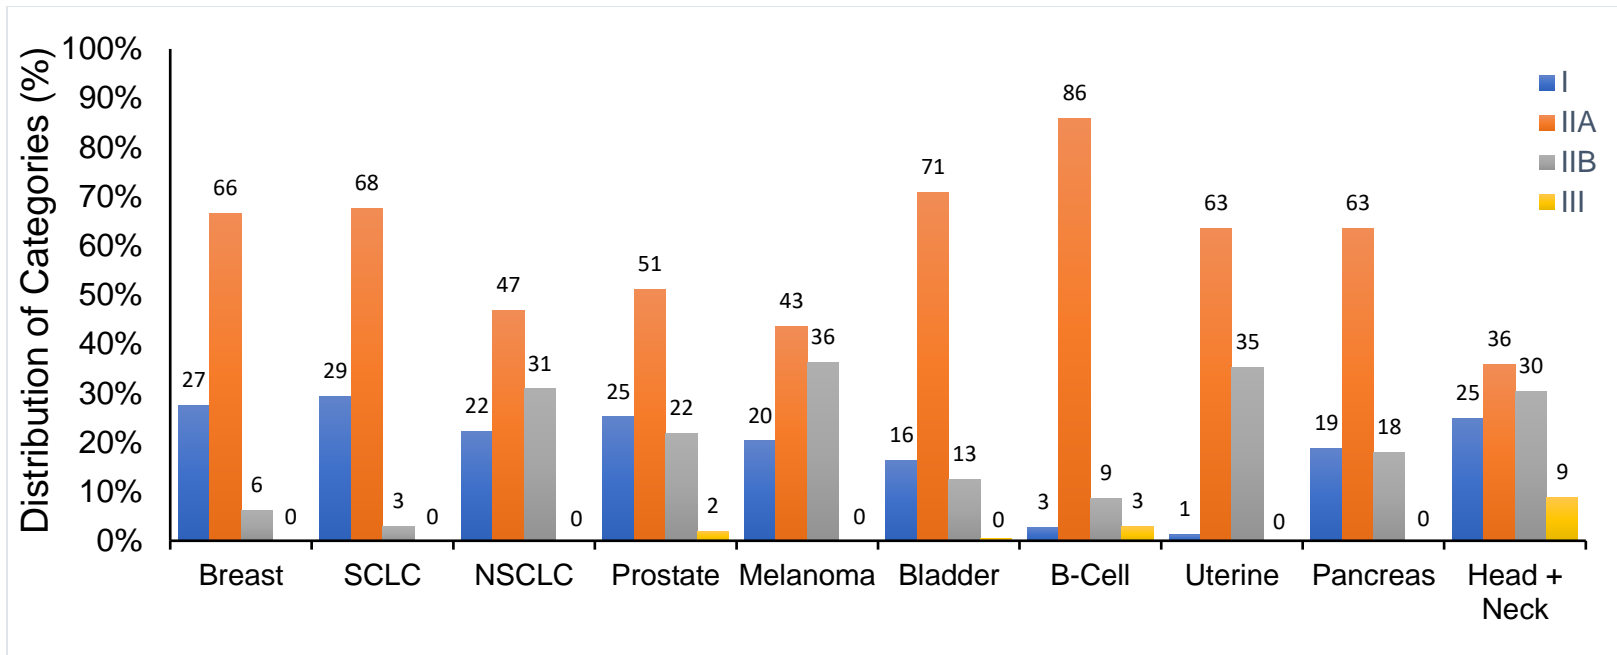

**Supplementary Figure 3A.** Distribution of NCCN categories of consensus and evidence for systemic treatments according to disease site.

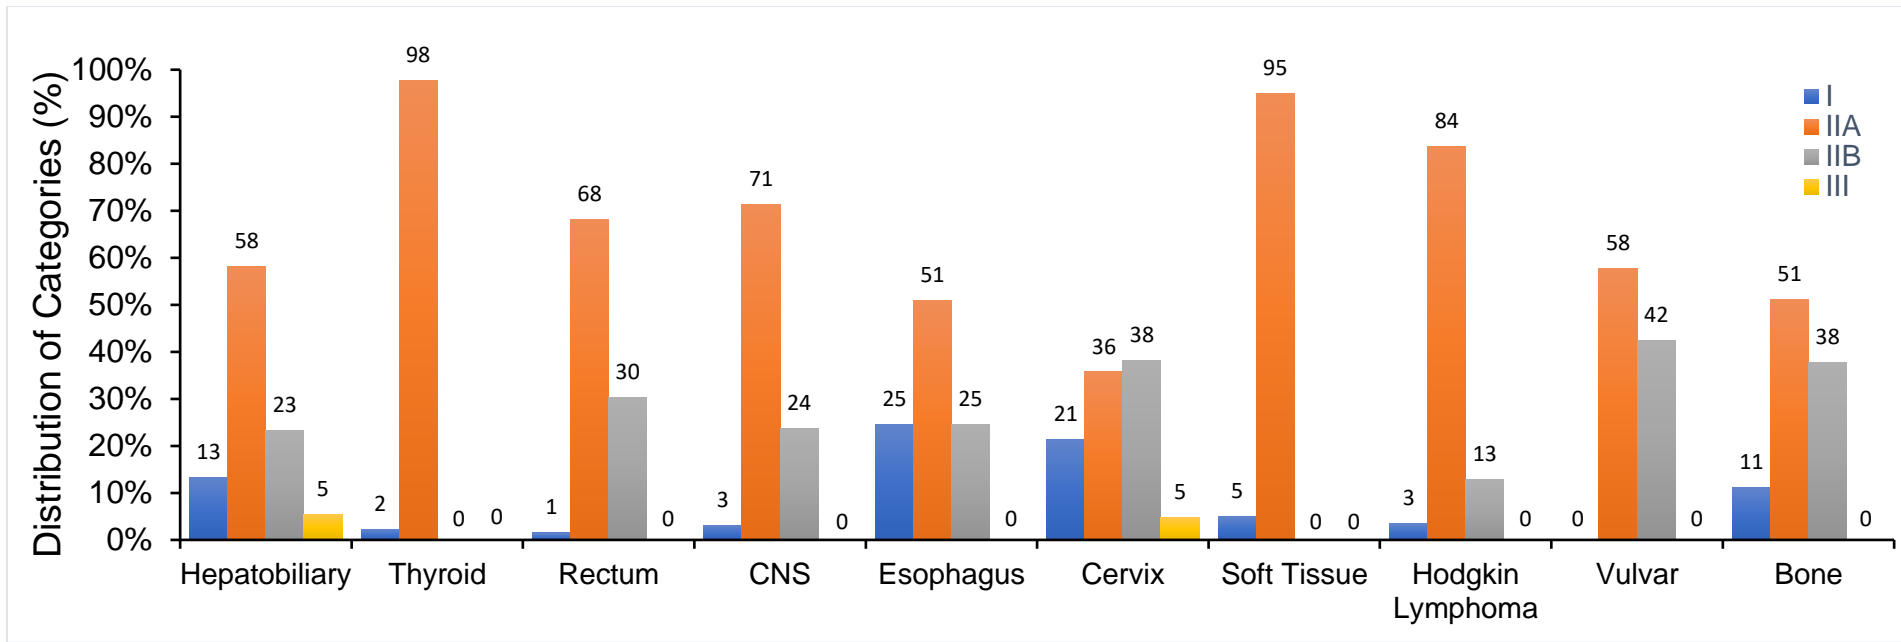

**Supplementary Figure 3B.** Distribution of NCCN categories of consensus and evidence for systemic treatments according to disease site.



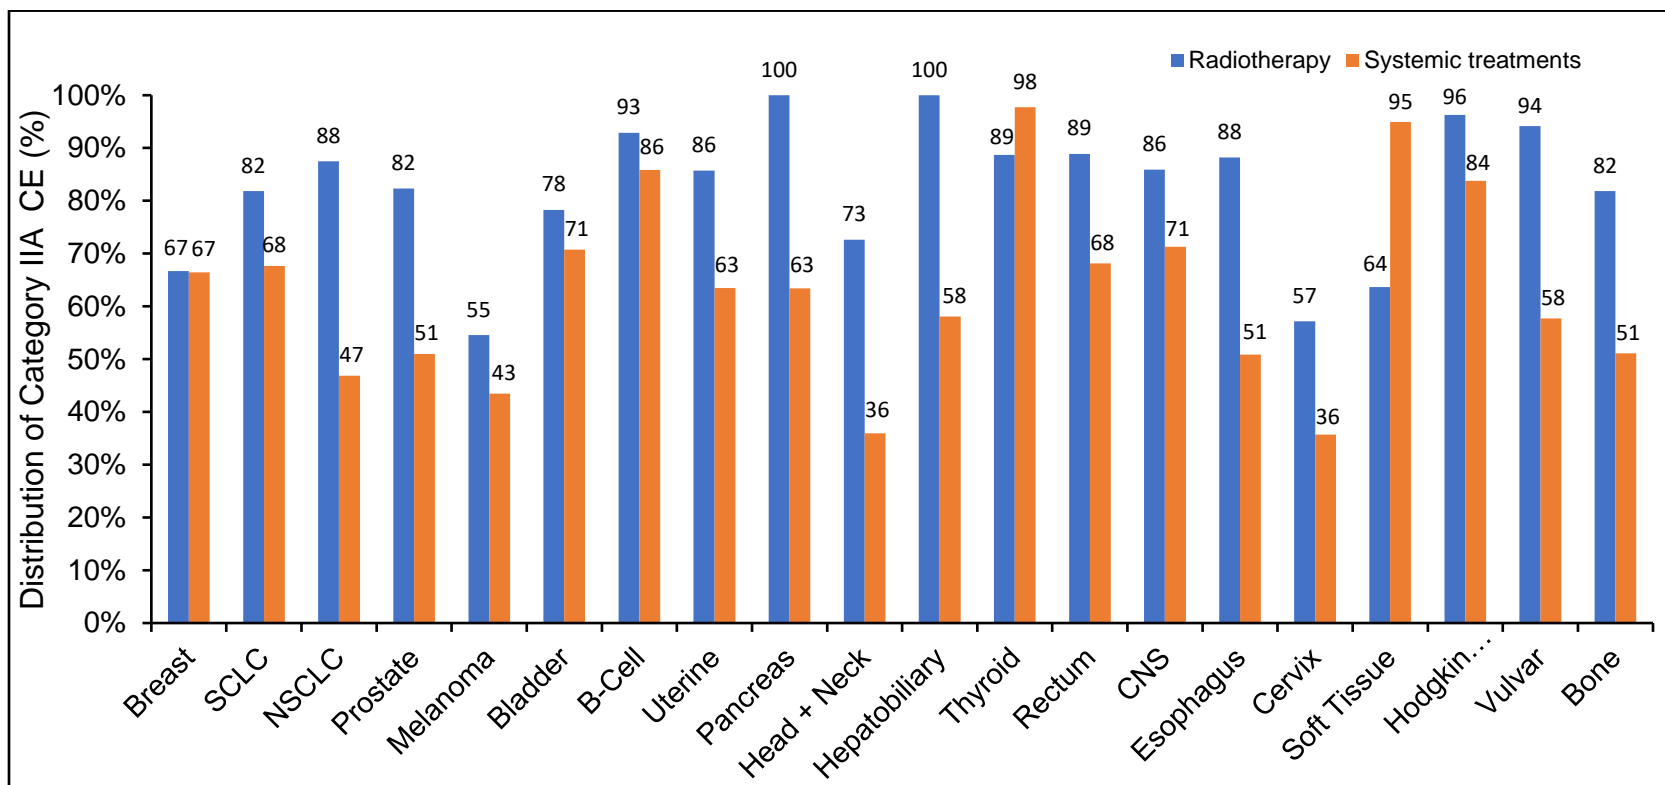

**Supplementary Figure 4.** Comparison of NCCN Category IIA consensus and evidence for radiation therapy versus Drugs and Biologics Compendium treatment by disease site.

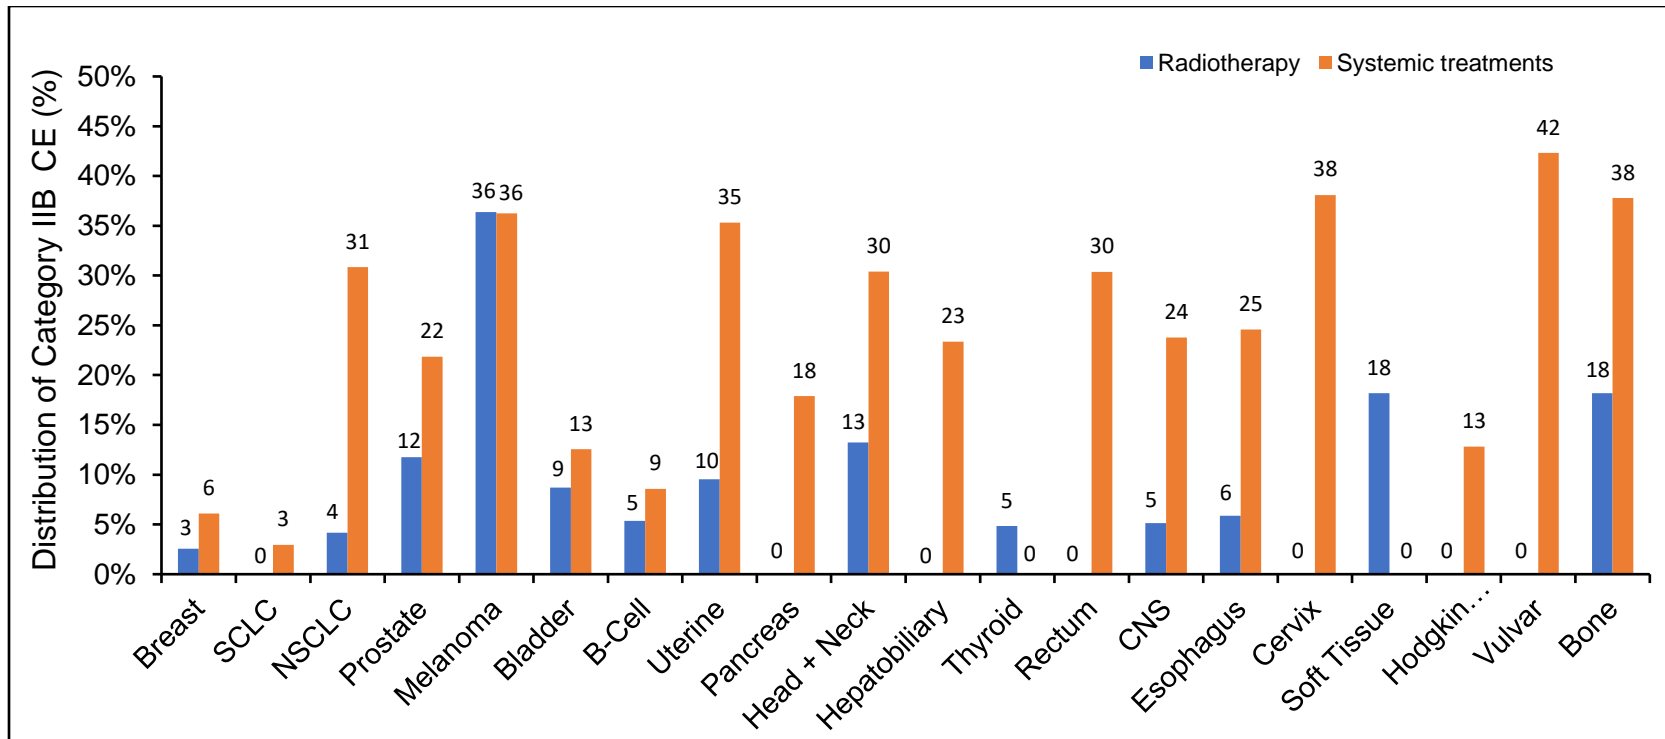

**Supplementary Figure 5.** Comparison of NCCN Category IIB consensus and evidence for radiation therapy versus Drugs and Biologics Compendium treatment by disease site.

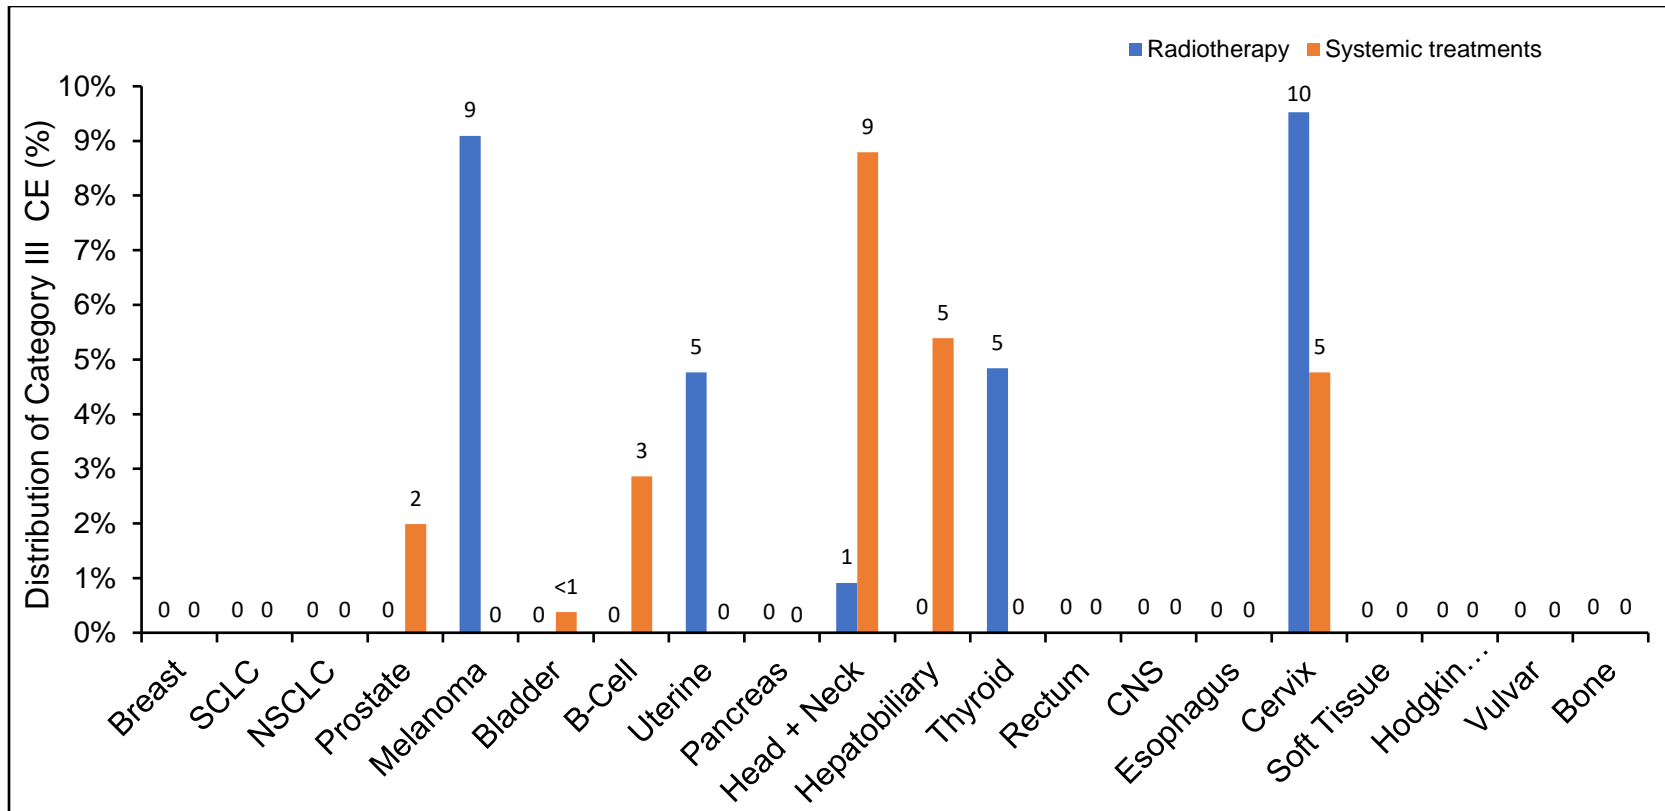

**Supplementary Figure 6.** Comparison of NCCN Category III consensus and evidence for radiation therapy versus Drugs and Biologics Compendium treatment by disease site.
